# Improvement of T stage precision by integration of surgical and pathological staging in radically resected stage pT3-pT4b gastric cancer

Hong-Hu Wang<sup>1</sup>, Kai Li<sup>1</sup>, Hao Xu<sup>1</sup>, Zhe Sun<sup>1</sup>, Zhen-Ning Wang<sup>1</sup> and Hui-Mian Xu<sup>1</sup>

<sup>1</sup> Department of Surgical Oncology, First Affiliated Hospital of China Medical University, Shenyang, Liaoning, China

Correspondence to: Hui-Mian Xu, email: cmu13940207707@163.com

Keywords: surgical staging, pathological staging, prognosis, gastric cancer

Received: May 16, 2016

Accepted: January 16, 2017

Published: January 26, 2017

Copyright: Wang et al. This is an open-access article distributed under the terms of the Creative Commons Attribution License 3.0 (CC BY 3.0), which permits unrestricted use, distribution, and reproduction in any medium, provided the original author and source are credited.

## ABSTRACT

**Background:** Both surgical TNM (sTNM) and pathological TNM (pTNM) staging are important clinicopathologic indexes of gastric cancer (GC). However, surgeons and pathologists might assess tumor depth differently in the same patient. To investigate the prognostic significance of sTNM status in patients with radically resected stage pT3-pT4b GC, we examined the relationship between sTNM and pTNM.

**Methods:** Clinicopathologic and survival data of 1289 patients with stage pT3-pT4b GC were studied retrospectively, in the aftermath of radical surgery.

**Results:** The unconformity for assessing tumor invasion depth were frequently exhibited between sT and pT staging. Comparison of 5-year OS among them, no significant differences were observed (pT3/sT3 vs pT3/sT4a,  $p=0.962$ ; pT4a/sT4b vs pT4b/sT4b,  $p=0.508$ ). Also, pT3/sT4b, pT4a/sT3 and pT4a/sT4a were homogeneity in prognosis. We proposed a revised pT stage in which surgical macroscopic T4b (sT4b) was incorporated into the pT stage, namely, patients in the pT3 stage with sT4b cancers were reclassified as being in the r-pT4a stage; patients in the pT4a stage with sT4b cancers were reclassified as being in the r-pT4b stage. In two-step multivariate analysis, revised pT stage proved more suitable for determining prognosis, surpassing both UICC/AJCC pT stage and sT stage as an independent prognostic index.

**Conclusions:** Surgical T stage is a significant and independent prognostic index of overall survival (OS) in patients with radically resected advanced GC. Patients in the pT3/4a stage with sT4b cancers, are potentially underestimated, and should be considered higher stage in terms of prognostic.

## INTRODUCTION

Gastric cancer (GC) is a disease with one of the poorest prognoses, and remains the second leading cause of cancer deaths worldwide [1-4]. It is commonly accepted that accurate/optimal staging of primary tumor invasion (pT stage) and regional lymph nodal metastasis (pN stage) is critical for assessing prognosis and decision-making proper adjuvant therapy after curative resection [5-8]. Nonetheless, they are always insufficient for predicting prognosis [9, 10]. Recently, in order to find more suitable prognostic index, many scholars had done a lot and some

changes had been done to the pN stage than the pT stage [11-16].

In our previous study, there is another staging system called surgical TNM (sTNM), which is applied to stage and assess in colon and rectum cancer, and it potentially influences patient auxiliary treatment decisions [17]. The sTNM staging is also based on the primary tumors, regional lymph nodes, and metastasis but is defined by surgeons according to the intraoperative findings [18-20]. However, few studies have investigated the prognostic significance of sTNM in gastric cancer. Based on our extensive clinical experience, assessment differences

were frequently exhibited between sTNM (macroscopic view) and pathological TNM (pTNM) (microscopic view) staging, especially for patients at T4b stage.

In light of these considerations, the aim of the present study was to investigate prognosis of T3-T4b stage GC patients with inconsistent assessments of tumor invasion between surgical and pathological staging. We also evaluated to integrate the surgical T (sT) stage with pathological T (pT) stage in terms of survival.

## MATERIALS AND METHODS

All patients with gastric cancer who underwent surgery at the Department of Oncology, First Affiliated Hospital of China Medical University from January 1985 to December 2010 were entered into a prospectively maintained database. A total of 1352 patients without distant metastasis or positive peritoneal cytology who underwent curative (R0) surgery (with D2/D3 lymphadenectomy) for primary GC, histologically proven and ultimately were confirmed as stage pT3-pT4b. Of these, 35 died in the postoperative period and were excluded. Follow-up of the entire study population was conducted until cancer related death or the cutoff date (December 31, 2011), by means of outpatient clinic consultation, and/or communication with patients through telephone or letter. Median and mean follow-up period were 29 and 48.55 months (range 1-312 months), respectively. At the time of the last follow-up, 28 were lost and were also excluded, leaving a total of 1289 patients for study enrollment. None received neoadjuvant chemotherapy.

The tumor of each gastric cancer was completely examined, furthermore the final macroscopic depth of invasion was confirmed by all of the surgeons present after tumor exploration. Subsequently the pathologists evaluated the postoperative tumor staging, named pT staging. Macroscopic assessment of tumor depth by surgeons during the operation named sT staging was

performed as follows: sT3 lesions were diagnosed when tumor invaded subserosal connective tissue, did not invade through the serosa; sT4a lesions when serosal involvement were visible and sT4b lesions were tumor invaded the adjacent structures. sT staging was prospectively determined by three surgeons, immediately after the abdominal cavity being opened. Disagreement about the diagnosis was resolved unanimously after discussion with all three surgeons present.

The study was approved by the Research Ethics Committee of China Medical University. Written informed consent was obtained from all patients prior to participation in this study.

All statistical computations relied on standard software (SPSS version 19.0; IBM Corporation, Armonk, NY, USA). Overall survival rates (OS) were determined by Kaplan-Meier method, using log-rank test was used to identify differences between survival curves of different patient groups. Cox's proportional hazard model (forward-stepwise method) was used for multivariate analysis to identify independent factors predicting prognosis. All *p*-values were two-tailed, with statistical significance set at  $p < 0.05$ .

## RESULTS

Clinicopathological characteristics of the 1289 patients of this cohort were summarized in Table 1. In our study, there were patients of 748 pT3 (58.03%), 506 pT4a (39.26%) and 35 pT4b (2.72%); but sT3: 238 (18.46%), sT4a: 580 (45.00%); sT4b: 471 (36.54%). Univariate analysis identified age, tumor location, tumor size, UICC/AJCC pT stage, sT stage, UICC/AJCC pN stage, histologic type, lymphovascular invasion and Borrmann type were significantly correlated with prognosis (Table 1).

As shown in Figure 1, prognosis differed significantly among patients of GC in stage pT3-pT4b and sT3-sT4b (each,  $p = 0.000$ ). Comparison 5-year OS

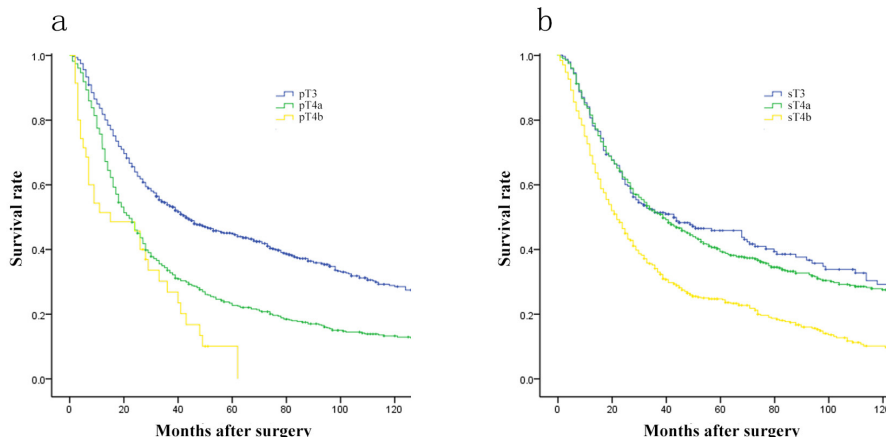

**Figure 1: Comparison of survival curves among patients according to the pT and sT stage (each,  $p = 0.000$ ).** A., Survival curves of patients with various pT stage. B., Survival curves of patients with various sT stage.

**Table 1: Clinicopathologic features of 1289 patients with gastric cancers.**

| Patient Characteristic  | N <sup>a</sup> | 5-YSR(%) <sup>b</sup> | P     |
|-------------------------|----------------|-----------------------|-------|
| Gender                  |                |                       | 0.267 |
| Male                    | 939            | 34.8                  |       |
| Female                  | 350            | 32.7                  |       |
| Age                     |                |                       | 0.014 |
| ≤ 60 years              | 697            | 37.0                  |       |
| >60 years               | 592            | 32.7                  |       |
| Tumor location          |                |                       | 0.000 |
| Entire                  | 95             | 15.2                  |       |
| Lower 1/3               | 766            | 37.7                  |       |
| Middle 1/3              | 226            | 39.9                  |       |
| Upper 1/3               | 202            | 28.7                  |       |
| Tumor size              |                |                       | 0.000 |
| ≤4cm                    | 376            | 40.5                  |       |
| >4cm                    | 913            | 32.8                  |       |
| UICC/AJCC pT stage      |                |                       | 0.000 |
| pT3                     | 748            | 44.9                  |       |
| pT4a                    | 506            | 22.7                  |       |
| pT4b                    | 35             | 10.1                  |       |
| sT stage                |                |                       | 0.000 |
| sT3                     | 238            | 45.9                  |       |
| sT4a                    | 580            | 39.4                  |       |
| sT4b                    | 471            | 24.8                  |       |
| UICC/AJCC pN stage      |                |                       | 0.000 |
| pN0                     | 348            | 56.2                  |       |
| pN1                     | 263            | 38.4                  |       |
| pN2                     | 296            | 29.8                  |       |
| pN3                     | 382            | 17.4                  |       |
| Histologic type         |                |                       | 0.001 |
| Differentiated          | 449            | 40.0                  |       |
| Undifferentiated        | 840            | 32.5                  |       |
| Lymphovascular invasion |                |                       | 0.000 |
| Negative                | 862            | 39.9                  |       |
| Positive                | 358            | 24.3                  |       |
| Borrmann type           |                |                       | 0.000 |
| Borrmann 1              | 31             | 45.2                  |       |
| Borrmann 2              | 197            | 46.7                  |       |
| Borrmann 3              | 915            | 34.4                  |       |
| Borrmann 4              | 136            | 19.5                  |       |
| Borrmann 5              | 10             | 40.0                  |       |

Abbreviations: n<sup>a</sup>: Number of patients. 5-YSR<sup>b</sup>: 5-year accumulative survival rate.

**Table 2: Comparison of prognosis among patients which were divided into 7 groups by pT and sT stage.**

| VS.       | pT3/sT3        |       | pT3/sT4a       |       | pT3/sT4b       |       | pT4a/sT3       |       | pT4a/sT4a      |       | pT4a/sT4b      |       | pT4b/sT4b      |       |
|-----------|----------------|-------|----------------|-------|----------------|-------|----------------|-------|----------------|-------|----------------|-------|----------------|-------|
|           | X <sup>2</sup> | p     |
| pT3/sT3   |                |       | 0.002          | 0.962 | 17.741         | 0.000 | 9.986          | 0.002 | 15.967         | 0.000 | 57.752         | 0.000 | 30.712         | 0.000 |
| pT3/sT4a  | 0.002          | 0.962 |                |       | 25.381         | 0.000 | 12.309         | 0.000 | 23.791         | 0.000 | 83.443         | 0.000 | 34.751         | 0.000 |
| pT3/sT4b  | 17.741         | 0.000 | 25.381         | 0.000 |                |       | 0.363          | 0.547 | 0.018          | 0.893 | 19.597         | 0.000 | 13.722         | 0.000 |
| pT4a/sT3  | 9.986          | 0.002 | 12.309         | 0.000 | 0.363          | 0.547 |                |       | 0.371          | 0.542 | 4.265          | 0.037 | 4.268          | 0.039 |
| pT4a/sT4a | 15.967         | 0.000 | 23.791         | 0.000 | 0.018          | 0.893 | 0.371          | 0.542 |                |       | 20.017         | 0.000 | 12.169         | 0.000 |
| pT4a/sT4b | 57.752         | 0.000 | 83.443         | 0.000 | 19.597         | 0.000 | 4.265          | 0.037 | 20.017         | 0.000 |                |       | 0.439          | 0.508 |
| pT4b/sT4b | 30.712         | 0.000 | 34.510         | 0.000 | 13.722         | 0.000 | 4.268          | 0.039 | 12.169         | 0.000 | 0.439          | 0.508 |                |       |

in every group of pT stage and sT stage respectively, we found that 5-year OS of patients differed significantly among various pT stages, but not in sT stage (Figure 1B). Subsequently, 5-year OS of various sT stages were compared by pT stage. For pT3 or pT4a stage, there were significant prognostic differences between sT3 and sT4b stage, as well as sT4a and sT4b stage, but not in sT3 and sT4a stage (Figure 2).

Furthermore, 1289 patients were divided into 7 groups by pT and sT stage, i) pT3/sT3: 183(14.20%); ii) pT3/sT4a: 336(26.07%); iii) pT3/sT4b: 230(17.84%); iv) pT4a/sT3: 55(4.27%); v) pT4a/sT4a: 244(18.93%); vi) pT4a/sT4b: 206(15.98%); vii) pT4b/sT4b: 35(2.72%). Comparison of 5-year OS among them, as shown in

Figure 3, no significant differences were observed (pT3/sT3 vs pT3/sT4a,  $p = 0.962$ ; pT4a/sT4b vs pT4b/sT4b,  $p = 0.508$ ), interestingly pT3/sT4b, pT4a/sT3 and pT4a/sT4a was homogeneity in prognosis (pT3/sT4b vs pT4a/sT3,  $p = 0.547$ ; pT3/sT4b vs pT4a/sT4a,  $p = 0.893$ ; pT4a/sT3 vs pT4a/sT4a,  $p = 0.542$ , respectively)(Table 2). Based on these results, we proposed a revision of pT staging (r-pT), whereby patients at stages pT3/sT4a, pT4a/sT4b were reclassified as stage pT4a, pT4b disease, respectively. Five-year OS curves by pT stage differed significantly for both UICC/AJCC pT staging and r-pT staging (each,  $p = 0.000$ ; Figure 4).

Univariate analysis identified age, tumor location, tumor size, UICC/AJCC pT stage, sT stage, UICC/AJCC

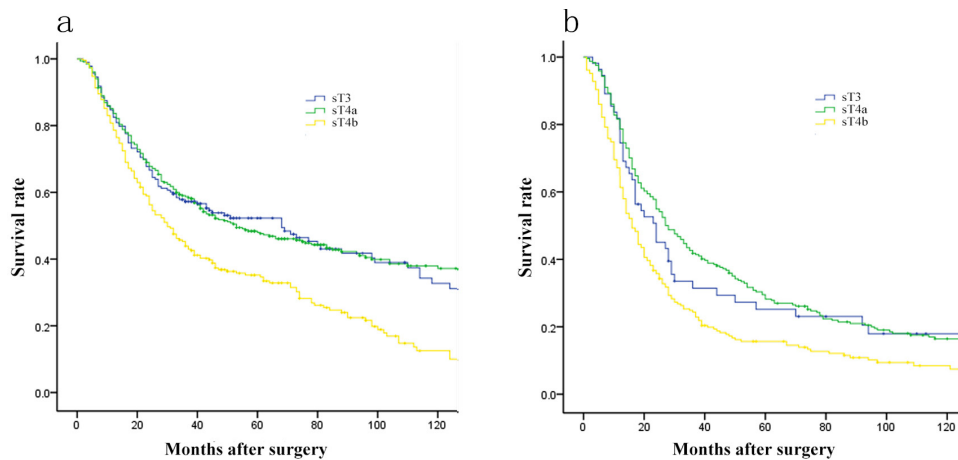

**Figure 2: Comparison of survival curves among patients of various sT stage by pT stage.** A. For patients in pT3 stage, there was no prognostic difference between sT3 and sT4a cancer ( $p = 0.962$ ). B. For patients in pT4a stage, there was no prognostic difference between sT3 and sT4a cancer ( $p = 0.542$ ).

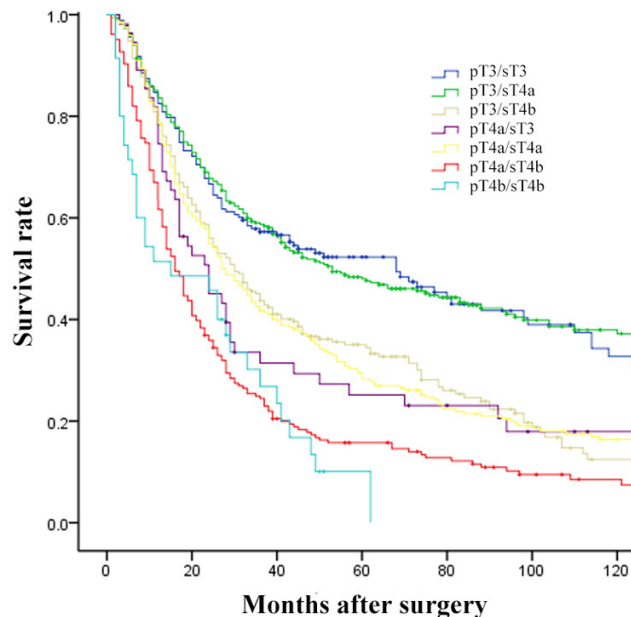

**Figure 3: Comparison of survival curves among patients which were divided into 7 groups by pT and sT stage.**

**Table 3: Two-step multivariate analysis of prognostic factors for 1289 patients**

| Characteristics         | Multivariate analysis step 1 <sup>a</sup> |             |          | Multivariate analysis step 2 <sup>B</sup> |             |          |
|-------------------------|-------------------------------------------|-------------|----------|-------------------------------------------|-------------|----------|
|                         | HR                                        | 95%CI       | <i>p</i> | HR                                        | 95%CI       | <i>p</i> |
| Age                     |                                           |             | 0.000    |                                           |             | 0.000    |
| ≤ 60 years              |                                           |             |          |                                           |             |          |
| >60 years               | 1.311                                     | 1.148-1.498 |          | 1.301                                     | 1.139-1.485 |          |
| Tumor location          |                                           |             | 0.000    |                                           |             | 0.000    |
| Entire                  |                                           |             |          |                                           |             |          |
| Lower 1/3               | 0.679                                     | 0.523-0.881 |          | 0.683                                     | 0.527-0.886 |          |
| Middle 1/3              | 0.679                                     | 0.509-0.906 |          | 0.684                                     | 0.514-0.911 |          |
| Upper 1/3               | 1.037                                     | 0.772-1.393 |          | 1.057                                     | 0.789-1.416 |          |
| UICC/AJCC pT stage      |                                           |             | 0.000    |                                           |             |          |
| pT3                     |                                           |             |          |                                           |             |          |
| pT4a                    | 1.549                                     | 1.350-1.777 |          |                                           |             |          |
| pT4b                    | 1.728                                     | 1.109-2.693 |          |                                           |             |          |
| sT stage                |                                           |             | 0.000    |                                           |             |          |
| sT3                     |                                           |             |          |                                           |             |          |
| sT4a                    | 0.849                                     | 0.697-1.035 |          |                                           |             |          |
| sT4b                    | 1.322                                     | 1.079-1.619 |          |                                           |             |          |
| UICC/AJCC pN stage      |                                           |             | 0.000    |                                           |             | 0.000    |
| pN0                     |                                           |             |          |                                           |             |          |
| pN1                     | 1.489                                     | 1.213-1.827 |          | 1.477                                     | 1.204-1.812 |          |
| pN2                     | 1.752                                     | 1.434-2.140 |          | 1.725                                     | 1.413-2.105 |          |
| pN3                     | 2.597                                     | 2.141-3.149 |          | 2.569                                     | 2.120-3.114 |          |
| Lymphovascular invasion |                                           |             | 0.002    |                                           |             | 0.002    |
| Negative                |                                           |             |          |                                           |             |          |
| Positive                | 1.258                                     | 1.088-1.454 |          | 1.256                                     | 1.087-1.451 |          |
| Borrmann type           |                                           |             | 0.004    |                                           |             | 0.004    |
| Borrmann 1              |                                           |             |          |                                           |             |          |
| Borrmann 2              | 0.790                                     | 0.497-1.257 |          | 0.801                                     | 0.504-1.272 |          |
| Borrmann 3              | 1.032                                     | 0.665-1.601 |          | 1.048                                     | 0.676-1.623 |          |
| Borrmann 4              | 1.355                                     | 0.836-2.194 |          | 1.371                                     | 0.847-2.218 |          |
| Borrmann 5              | 0.900                                     | 0.358-2.261 |          | 0.919                                     | 0.367-2.298 |          |
| Revised pT stage        |                                           |             |          |                                           |             | 0.000    |
| rT3                     |                                           |             |          |                                           |             |          |
| rT4a                    |                                           |             |          | 1.490                                     | 1.279-1.736 |          |
| rT4b                    |                                           |             |          | 2.299                                     | 1.911-2.767 |          |

Abbreviations: UICC, International Union Against Cancer; AJCC, American Joint Committee on Cancer; HR, hazard ratio; CI, confidence interval.

<sup>a</sup>: Step 1, with consideration of all significantly important prognostic factors in univariate analysis, except for the revised pT stage

<sup>b</sup>: Step 2, with consideration of all significantly important prognostic factors in univariate analysis, including the revised pT stage

pN stage, histologic type, lymphovascular invasion and Borrmann type were significantly correlated with prognosis (Table 1). To decide which pT staging approach was more suitable as a prognostic index, a two-step multivariate analysis of prognosis in stage pT3-pT4b GC was conducted. In step 1, all significant prognostic factors of univariate analysis were considered, with exception of r-pT stage. We found that age, location of primary tumor, pT stage, sT stage, pN stage, lymphovascular invasion, and Borrmann type were independent factors in predicting prognosis. However, once r-pT stage was added in step 2, it surpassed both UICC/AJCC pT stage and sT stage as a critical prognostic factor (Table 3).

## DISCUSSION

In the present study of GC patients in T3-T4b stage, comparison 5-year OS in every group of pT stage and sT stage respectively, we found that survival of patients differed significantly among various pT stage, and also in sT stage. In the next step, 1289 patients were divided into 7 groups by pT and sT stage. Our data revealed that there were no significant prognostic differences between pT4a/sT3-4a and pT3/sT4b, as well as pT4a/sT4b and pT4b/sT4b. Based on these results, we therefore formulated our r-pT staging, where pT3/sT4b and pT4a/sT4b stages GC were incorporated as stage pT4a and pT4b disease, respectively. In this setting, univariate analysis revealed that both sT and pT were important independent prognostic factors. Two-step multivariate analysis confirmed that r-pT

stage surpassed both UICC/AJCC pT stage and sT stage as a critical prognostic factor in the prognostic hierarchy.

Our previous study explained some possible reasons of uncomformity between pT stage and sT stage [19, 21]. Major present study additions to this line of investigation were as follows: (1) our study focused on stage T3-T4b GC, because it was difficult to perform accurate assessment of stage T1-T2 GC during the operation; (2) patients were divided into 7 subgroups by pT and sT stage, furthermore were grouped into 3 groups in terms of prognosis; (3) we proposed the revised T stage, importantly integrated macroscopic tumor invasion into TNM stage.

Although primary tumor invasion is significantly and independently predictive of 5-year OS in GC patients, UICC/AJCC pT stage remains always insufficient for predicting prognosis, and recently many scholars have reported that some novel T stages based on several indexes was more suitable in predicting survival [10, 14, 22, 23]. According to numerous previous studies and our practice, the uncomformity for assessing tumor invasion depth were frequently exhibited between sT and pT staging [21]. Our finding revealed that there were 835 patients with inconsistent depth of invasion in this setting, therein 436 patients were T4b stage. Pathologists and surgeons have respective difficulty in determining whether tumor invaded the adjacent structures or not. It may be the cause that pathologists and surgeons lack for enough intraoperative finding and sufficient histologic proof during operation, respectively.

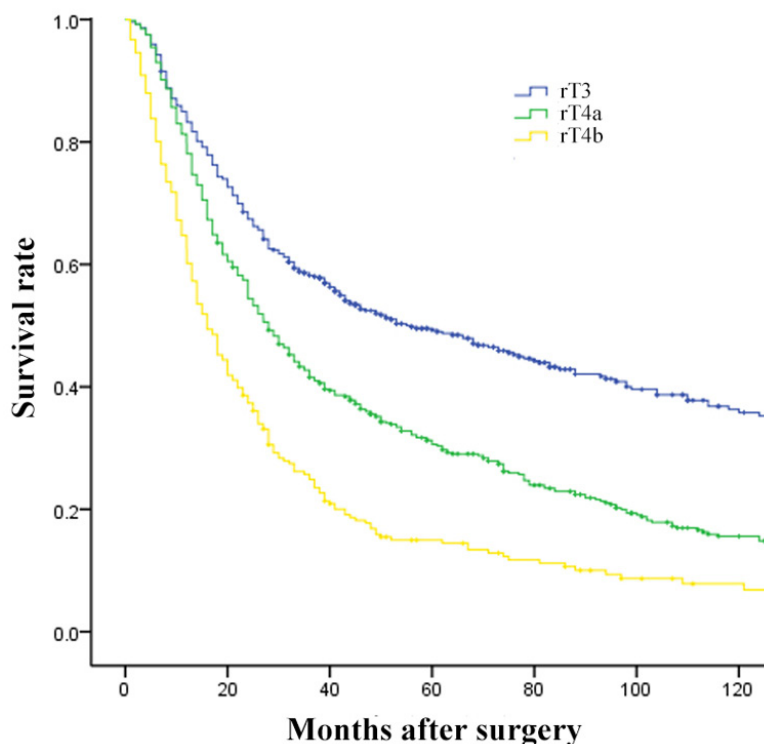

Figure 4: Comparison of survival curves among patients according to the revised T stage ( $p = 0.000$ ).

The integration of sT and pT staging has distinct advantages and alluring prospects in clinical application [17]. Macroscopic T stage is easily assigned by surgeons, based on gross serosal appearances during open laparotomy, providing a simple and effective method to assess patient prognosis [14, 24]. Likewise, microscopic T stage is routinely reported by pathologists after operation. We may use the macroscopic and microscopic integration to infer the most accurate depth of primary tumor infiltration, thus avoiding a migration in postoperative pT stage. In consideration of the prognostic value of macroscopic and microscopic integration in our hands, we think that its status is critical in deciding whether and how intraoperative and postoperative adjuvant therapy is administered. Thus, further studies are needed to test this premise.

Several limitations of this investigation are acknowledged. The surgical T stage mainly depends on gross macroscopic observations, which may partially vary by individual. Also, This retrospective study ( $n = 1289$ ) was confined to a single Chinese institution. Larger international multicenter samplings should be analyzed to confirm our findings.

In conclusion, our data demonstrate that both surgical T stage and pathological T stage are independent factors for predicting prognosis in patients with radically resected stage pT3-pT4b GC. Importantly, their integration could be applied to more accurately predict the patient prognosis.

## CONFLICTS OF INTERESTS

The authors declare that they have no competing interests.

## REFERENCES

- Papenfuss WA, Kukar M, Oxenberg J, Attwood K, Nurkin S, Malhotra U, Wilkinson NW. Morbidity and Mortality Associated with Gastrectomy for Gastric Cancer. *Ann Surg Oncol*. 2014; 21:3008-14.
- Di Leo A, Pedrazzani C, Bencivenga M, Coniglio A, Rosa F, Morgani P, Marrelli D, Marchet A, Cozzaglio L, Giacomuzzi S, Tiberio GA, Doglietto GB, Vittimberga G, et al. Gastric Stump Cancer After Distal Gastrectomy for Benign Disease: Clinicopathological Features and Surgical Outcomes. *Ann Surg Oncol*. 2014; 21:2594-600.
- Malinowska M, Nasierowska-Guttmejer A. Epidemiology and pathogenesis of gastric cancer. *Pol J Pathol*. 2013; 64:s17-26.
- Fock KM. Review article: the epidemiology and prevention of gastric cancer. *Aliment Pharmacol Ther*. 2014; 40:250-60.
- Pan QX, Su ZJ, Zhang JH, Wang CR, Ke SY. A comparison of the prognostic value of preoperative inflammation-based scores and TNM stage in patients with gastric cancer. *OncoTargets and therapy*. 2015; 8:1375-85.
- Takahashi M, Takeuchi H, Tsuwano S, Nakamura R, Takahashi T, Wada N, Kawakubo H, Saikawa Y, Kitagawa Y. Surgical Resection of Remnant Gastric Cancer Following Distal Gastrectomy: A Retrospective Clinicopathological Study. *Ann Surg Oncol*. 2016; 23:511-21. doi: 10.1245/s10434-015-4678-x.
- Hayashi T, Yoshikawa T, Bonam K, Sue-Ling HM, Taguri M, Morita S, Tsuburaya A, Hayden JD, Grabsch HI. The superiority of the seventh edition of the TNM classification depends on the overall survival of the patient cohort: comparative analysis of the sixth and seventh TNM editions in patients with gastric cancer from Japan and the United Kingdom. *Cancer*. 2013; 119:1330-7.
- Wittekind C. The development of the TNM classification of gastric cancer. *Pathology international*. 2015; 65:399-403.
- Deng J, Zhang R, Zhang L, Liu Y, Hao X, Liang H. Negative node count improvement prognostic prediction of the seventh edition of the TNM classification for gastric cancer. *PloS one*. 2013; 8:e80082.
- Jiang N, Deng JY, Ding XW, Liu Y, Liang H. Tumor volume as a prognostic factor was superior to the seventh edition of the pT classification in resectable gastric cancer. *Eur J Surg Oncol*. 2015; 41:315-22.
- Sun Z, Xu Y, Li DM, Wang ZN, Zhu GL, Huang BJ, Li K, Xu HM. Log odds of positive lymph nodes: a novel prognostic indicator superior to the number-based and the ratio-based N category for gastric cancer patients with R0 resection. *Cancer*. 2010; 116:2571-80.
- Bilici A, Ustaalioglu BB, Gumus M, Seker M, Yilmaz B, Kefeli U, Yildirim E, Sonmez B, Salepci T, Kement M, Mayadagli A. Is metastatic lymph node ratio superior to the number of metastatic lymph nodes to assess outcome and survival of gastric cancer? *Onkologie*. 2010; 33:101-5.
- Lee HS, Lee HE, Yang HK, Kim WH. Perigastric tumor deposits in primary gastric cancer: implications for patient prognosis and staging. *Ann Surg Oncol*. 2013; 20:1604-13.
- Wang HH, Huang JY, Wang ZN, Sun Z, Li K, Xu HM. Macroscopic Serosal Classification as a Prognostic Index in Radically Resected Stage pT3-pT4b Gastric Cancer. *Ann Surg Oncol*. 2016; 23:149-55. doi: 10.1245/s10434-015-4656-3.
- Im WJ, Kim MG, Ha TK, Kwon SJ. Tumor size as a prognostic factor in gastric cancer patient. *J Gastric Cancer*. 2012; 12:164-72.
- Sun Z, Zhu GL, Lu C, Guo PT, Huang BJ, Li K, Xu Y, Li DM, Wang ZN, Xu HM. The impact of N-ratio in minimizing stage migration phenomenon in gastric cancer patients with insufficient number or level of lymph node retrieved: results from a Chinese mono-institutional study in 2159 patients. *Ann Oncol*. 2009; 20:897-905.
- Liang JW, Gao P, Wang ZN, Song YX, Xu YY, Wang MX, Dong YL, Xu HM. The integration of macroscopic tumor

- invasion of adjacent organs into TNM staging system for colorectal cancer. *PLoS one*. 2012; 7:e52269.
18. Markman M. Surgical staging of cancer: impact on prognosis and potential for bias in clinical trials. *Curr Oncol Rep*. 2003; 5:437-8.
  19. Madden MV, Price SK, Learmonth GM, Dent DM. Surgical staging of gastric carcinoma: sources and consequences of error. *Br J Surg*. 1987; 74:119-21.
  20. Harisi R, Schaff Z, Flautner L, Winternitz T, Jaray B, Nemeth Z, Kupcsulik P, Weltner J. Evaluation and comparison of the clinical, surgical and pathological TNM staging of colorectal cancer. *Hepatogastroenterology*. 2008; 55:66-72.
  21. Xu HM, Chen JQ, Wang SB, Qi CL, Shan JX. Prediction of the staging and biological behavior from the serosal change in gastric cancer. *J China Medical University*. 1995; 24:352-355.
  22. Sun Z, Wang ZN, Xu YY, Zhu GL, Huang BJ, Xu Y, Liu FN, Zhu Z, Xu HM. Prognostic significance of tumor deposits in gastric cancer patients who underwent radical surgery. *Surgery*. 2012; 151:871-81.
  23. Marchet A, Mocellin S, Ambrosi A, Morgagni P, Vittimberga G, Roviello F, Marrelli D, de Manzoni G, Minicozzi A, Tiberio G, Pacelli F, Rosa F, Nitti D. Validation of the new AJCC TNM staging system for gastric cancer in a large cohort of patients ( $n = 2,155$ ): focus on the T category. *Eur J Surg Oncol*. 2011; 37:779-85.
  24. Sun Z, Xu YY, Wang ZN, Zhu Z, Zhang H, Huang BJ, Xu Y, Chen JQ, Xu HM. Macroscopic serosal classification predicts peritoneal recurrence for patients with gastric cancer underwent potentially curative surgery. *Ann Surg Oncol*. 2011; 18:1068-80.
